# Supplementary material
Source: ML conference proceedings conference paper supplement (https://aclanthology.org/P18-2011)
Supplement: Software [file alias_detection_ACL_Appendix.pdf › SupplementaryMaterial_AliasDetection/alias_detection_ACL_Appendix.pdf]

# Supplementary Material for Identification of Alias Links among Participants in Narratives

Sangameshwar Patil Sachin Pawar Swapnil Hingmire Girish K. Palshikar

{sangameshwar.patil, sachin7.p}@tcs.com

{swapnil.hingmire, gk.palshikar}@tcs.com

TCS Research, Tata Consultancy Services, India

Vasudeva Varma

vv@iiit.ac.in

IIIT Hyderabad, India

Pushpak Bhattacharyya

pb@cse.iitb.ac.in

IIT Patna, India

## A Appendix

For reproducibility, we give additional auxiliary details in this Appendix. Also, output of our approach as well as all the baselines has been uploaded as supplementary material along with the submission.

| Dataset | #Sents | # Distinct canonical mentions | Avg. words per Sentence |
|---------|--------|-------------------------------|-------------------------|
| Nap     | 113    | 116                           | 16.30                   |
| Fas     | 122    | 120                           | 13.84                   |
| BoH     | 77     | 98                            | 20.71                   |
| Mao     | 122    | 214                           | 26.49                   |

Table A.1: Statistical properties of the datasets

### Details of checkWordNetHypernyms() :

We have manually categorized a few WordNet synsets as shown in Table A.2. For each generic NP headword if any of these synsets appear as ancestors in its WordNet hypernym tree, we assign the corresponding participant type. We use only the first sense of the headword in WordNet. Figure A.1 shows the hypernym tree for the headword school of the participant a military school.

- **S: (n) school** (an educational institution) "the school was founded in 1900"
  - [direct hyponym](#) / [full hyponym](#)
  - [member meronym](#)
  - [direct hypernym](#) / [inherited hypernym](#) / [sister term](#)
    - **S: (n) educational institution** (an institution dedicated to education)
      - **S: (n) institution, establishment** (an organization founded and united for a specific purpose)
        - **S: (n) organization, organisation** (a group of people who work together)

Figure A.1: Checking WordNet hypernyms for school

| Type | Synsets                                                                                                                                                          |
|------|------------------------------------------------------------------------------------------------------------------------------------------------------------------|
| PER  | {person, individual, someone, somebody, mortal}                                                                                                                  |
| ORG  | {organization, organisation}; {social group}; {place of business, business establishment}                                                                        |
| LOC  | {geological formation, formation}; {location}; {land}; {direction, way}; {passage}; {position, spatial relation}; {body of water, water}; {kingdom, land, realm} |

Table A.2: Manually categorized WordNet synsets for participant types

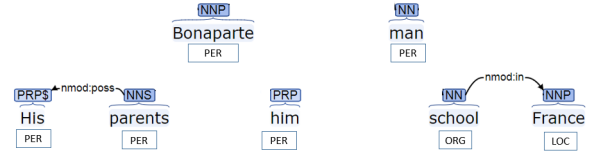

Figure A.2:  $G'$  corresponding to sentences in Figure 1 (in the main draft) at the beginning of Phase-III of Algorithm 1
